# Supplementary material for: Pathology of acute sub-lethal or near-lethal irradiation of nonhuman primates prophylaxed with the nutraceutical, gamma tocotrienol
Source: PubMed Central journal article supplement (PMC11164941; doi:10.1038/s41598-024-64102-8), 2024-06-10
Supplement: 41598_2024_64102_MOESM1_ESM.pdf [file 41598_2024_64102_MOESM1_ESM.pdf]

**Supplementary Table 1.** Body weights of NHPs subjected to 4 or 5.8 Gy TBI or PBI and treated with GT3 or vehicle

| Radiation Dose | Exposure Level | Treatment | Euthanasia (d) | NHP#    | Sex   | Age (years) | Body weight  |       |          |
|----------------|----------------|-----------|----------------|---------|-------|-------------|--------------|-------|----------|
|                |                |           |                |         |       |             | Initial (kg) | d 30  | % Change |
| 4 Gy           | PBI            | Vehicle   | 30             | 1603102 | F     | 3.9         | 4.66         | 4.74  | 1.72     |
|                |                |           |                | 1707119 | M     | 3.8         | 5.42         | 5.36  | -1.11    |
|                |                |           |                | 1704305 | M     | 2.8         | 4.32         | 4.36  | 0.93     |
|                |                | 1603026   |                | F       | 3.9   | 5.98        | 5.84         | -2.34 |          |
|                |                | 1603079   |                | M       | 3.9   | 5.28        | 5.18         | -1.89 |          |
|                |                | 1704119   |                | M       | 3.8   | 5.38        | 5.42         | 0.74  |          |
|                |                | 1606088   |                | F       | 3.6   | 5.92        | 5.86         | -1.01 |          |
|                | 1603168        | F         | 3.9            | 5.06    | 5.62  | 11.07       |              |       |          |
|                | TBI            | Vehicle   | 30             | RA2695  | M     | 4.7         | 9.44         | 9.04  | -4.24    |
|                |                |           |                | 1606069 | M     | 3.6         | 5.02         | 4.98  | -0.80    |
|                |                |           |                | RA3228  | F     | 4.1         | 6.76         | 6.40  | -5.33    |
|                |                | 1608010   |                | F       | 3.5   | 4.38        | 4.38         | 0.00  |          |
|                |                | RA3275    |                | M       | 3.9   | 6.14        | 6.36         | 3.58  |          |
|                |                | 1606093   |                | M       | 3.6   | 4.74        | 5.02         | 5.91  |          |
| RA2770         |                | F         |                | 5.1     | 4.90  | 4.88        | -0.41        |       |          |
| 1607012        | F              | 3.5       | 5.86           | 5.44    | -7.17 |             |              |       |          |
| 5.8 Gy         | PBI            | Vehicle   | 30             | 1608017 | M     | 3.5         | 5.42         | 5.48  | 1.11     |
|                |                |           |                | 1608018 | F     | 3.5         | 5.16         | 5.00  | -3.10    |
|                |                |           |                | 1604188 | F     | 3.8         | 5.52         | 5.68  | 2.90     |
|                |                | 1608007   |                | M       | 3.5   | 5.00        | 4.76         | -4.80 |          |
|                |                | 1708011   |                | M       | 2.5   | 5.10        | 5.06         | -0.78 |          |
|                | TBI            | GT3       | 30             | 1603104 | F     | 3.9         | 4.10         | 4.04  | -1.46    |
|                |                |           |                | 1608006 | F     | 3.5         | 5.00         | 5.56  | 11.20    |
|                |                | Vehicle   |                | 1608039 | M     | 3.5         | 4.94         | 4.88  | -1.21    |
|                |                |           |                | 1603015 | M     | 3.9         | 4.72         | 4.44  | -5.93    |
|                |                |           |                | 1607030 | F     | 3.5         | 3.84         | 3.90* | 1.56     |
|                |                |           |                | 1608016 | F     | 3.5         | 5.38         | 4.55* | -15.43   |
| GT3            | 30             | 1703269   | M              | 2.9     | 5.00  | 4.72        | -5.60        |       |          |
|                |                | 1607029   | M              | 3.5     | 4.52  | 4.56        | 0.88         |       |          |
|                |                | 1603138   | F              | 3.9     | 4.62  | 4.50        | -2.60        |       |          |
|                |                | 1603030   | F              | 3.9     | 4.78  | 4.76        | -0.42        |       |          |

\* These weights were recorded on d 20 due to early euthanasia.

d, day

**Supplementary Table 2.** Body temperatures of NHPs subjected to 4 or 5.8 Gy TBI or PBI and treated with GT3 or vehicle

| Radiation Dose | Exposure Level | Treatment | Euthanasia (d) | NHP#    | Sex | Age (years) | Temperature (Celsius) recorded post-irradiation (d) |       |       |       |       |       |       |       |       |       |       |       |
|----------------|----------------|-----------|----------------|---------|-----|-------------|-----------------------------------------------------|-------|-------|-------|-------|-------|-------|-------|-------|-------|-------|-------|
|                |                |           |                |         |     |             | -8                                                  | 2     | 7     | 14    | 16    | 18    | 20    | 22    | 24    | 26    | 28    | 30    |
| 4 Gy           | PBI            | Vehicle   | 30             | 1603102 | F   | 3.9         | 37.72                                               | 37.22 | 38.39 | 38.50 | 38.72 | 38.22 | 38.33 | 38.56 | 38.67 | 38.50 | 38.61 | 38.50 |
|                |                |           |                | 1707119 | M   | 3.8         | 39.06                                               | 38.83 | 39.33 | 39.28 | 39.22 | 39.78 | 39.56 | 39.72 | 39.56 | 40.28 | 38.72 | 40.39 |
|                |                |           |                | 1704305 | M   | 2.8         | 38.06                                               | 38.11 | 39.17 | 38.67 | 38.72 | 38.78 | 39.00 | 39.28 | 39.22 | 39.28 | 39.06 | 38.67 |
|                |                |           |                | 1603026 | F   | 3.9         | 38.67                                               | 38.28 | 38.39 | 38.06 | 39.33 | 39.17 | 39.28 | 39.61 | 39.50 | 39.56 | 39.44 | 38.61 |
|                |                | 1603079   |                | M       | 3.9 | 39.06       | 38.56                                               | 39.11 | 39.06 | 38.39 | 39.33 | 38.61 | 39.00 | 39.28 | 38.06 | 37.61 | 38.94 |       |
|                |                | 1704119   |                | M       | 3.8 | 38.78       | 39.22                                               | 39.50 | 39.50 | 39.83 | 40.06 | 39.83 | 39.89 | 40.33 | 40.44 | 39.50 | 40.17 |       |
|                |                | 1606088   |                | F       | 3.6 | 38.50       | 38.83                                               | 40.06 | 39.72 | 39.33 | 39.22 | 39.17 | 39.39 | 38.67 | 38.61 | 39.61 | 39.67 |       |
|                |                | 1603168   |                | F       | 3.9 | 38.83       | 38.89                                               | 39.28 | 39.22 | 40.00 | 39.78 | 39.72 | 39.94 | 39.28 | 39.17 | 39.72 | 40.39 |       |
|                | TBI            | Vehicle   | 30             | RA2695  | M   | 4.7         | 38.22                                               | 39.11 | 38.44 | 38.83 | 37.44 | 37.39 | 38.94 | 38.50 | 37.39 | 38.28 | 38.72 | 39.28 |
|                |                |           |                | 1606069 | M   | 3.6         | 38.22                                               | 39.50 | 39.50 | 38.89 | 39.50 | 39.89 | 39.33 | 39.17 | 39.78 | 39.83 | 40.50 | 39.28 |
|                |                |           |                | RA3228  | F   | 4.1         | 40.72                                               | 39.61 | 38.50 | 39.39 | 38.44 | 37.39 | 39.11 | 39.22 | 38.06 | 38.72 | 38.72 | 38.72 |
|                |                |           |                | 1608010 | F   | 3.5         | 38.67                                               | 38.28 | 37.72 | 38.28 | 38.50 | 38.44 | 39.06 | 38.89 | 38.67 | 38.67 | 38.67 | 38.00 |
|                |                | RA3275    |                | M       | 3.9 | 39.17       | 39.28                                               | 38.50 | 38.83 | 38.11 | 37.50 | 38.72 | 38.50 | 38.39 | 38.83 | 38.06 | 39.11 |       |
|                |                | 1606093   |                | M       | 3.6 | 38.61       | 38.94                                               | 39.06 | 38.72 | 39.33 | 39.44 | 39.44 | 39.06 | 39.67 | 39.44 | 39.39 | 39.11 |       |
|                |                | RA2770    |                | F       | 5.1 | 39.83       | 38.72                                               | 39.50 | 38.94 | 37.89 | 38.39 | 39.11 | 39.06 | 37.72 | 38.22 | 38.28 | 39.06 |       |
|                |                | 1607012   |                | F       | 3.5 | 38.94       | 38.56                                               | 38.72 | 38.89 | 39.44 | 39.22 | 39.44 | 40.11 | 39.44 | 39.56 | 39.89 | 39.39 |       |
| 5.8 Gy         | PBI            | Vehicle   | 30             | 1608017 | M   | 3.5         | 38.72                                               | 36.56 | 36.89 | 36.94 | 39.11 | 39.33 | 39.11 | 39.17 | 39.50 | 40.72 | 40.78 | 38.83 |
|                |                |           |                | 1608018 | F   | 3.5         | 39.11                                               | 36.28 | 37.06 | 37.66 | 40.06 | 39.78 | 39.89 | 40.00 | 40.44 | 40.94 | 40.06 | 39.27 |
|                |                |           |                | 1604188 | F   | 3.8         | 38.50                                               | 38.39 | 37.11 | 37.72 | 39.28 | 39.17 | 38.78 | 39.17 | 40.44 | 40.56 | 39.28 | 38.20 |
|                |                |           |                | 1608007 | M   | 3.5         | 39.39                                               | 38.72 | 38.89 | 36.77 | 40.22 | 40.06 | 39.89 | 40.33 | 40.83 | 41.06 | 40.50 | 38.72 |
|                |                | 1708011   |                | M       | 2.5 | 38.89       | 38.11                                               | 38.72 | 38.27 | 38.33 | 39.17 | 39.11 | 39.28 | 39.39 | 40.00 | 39.83 | 37.88 |       |
|                |                | 1603104   |                | F       | 3.9 | 38.89       | 36.33                                               | 38.06 | 37.72 | 38.94 | 38.72 | 39.06 | 39.00 | 39.94 | 39.72 | 39.33 | 38.72 |       |
|                |                | 1608006   |                | F       | 3.5 | 38.94       | 37.61                                               | 38.39 | 37.77 | 39.28 | 39.44 | 39.17 | 39.33 | 39.50 | 39.83 | 40.83 | 39.50 |       |
|                |                | 1608039   |                | M       | 3.5 | 38.22       | 39.11                                               | 39.00 | 39.39 | 40.06 | 40.17 | 40.61 | 40.50 | 40.78 | 41.56 | 41.06 | 37.72 |       |
|                | TBI            | Vehicle   | 30             | 1603015 | M   | 3.9         | 37.56                                               | 38.50 | 38.83 | 38.39 | 39.33 | 39.22 | 39.39 | 40.06 | 39.94 | 39.89 | 38.78 | 38.39 |
|                |                |           |                | 1607030 | F   | 3.5         | 38.56                                               | 38.67 | 37.89 | 38.22 | 39.00 | 39.56 | 39.72 | ND    | ND    | ND    | ND    |       |
|                |                |           |                | 1608016 | F   | 3.5         | 37.50                                               | 38.39 | 38.06 | 37.67 | 39.50 | 40.00 | 38.50 | ND    | ND    | ND    | ND    |       |
|                |                |           |                | 1703269 | M   | 2.9         | 38.00                                               | 37.00 | 38.22 | 38.50 | 39.50 | 39.72 | 39.33 | 39.78 | 40.50 | 41.06 | 40.89 | 39.39 |
|                |                | 1607029   |                | M       | 3.5 | 38.17       | 37.56                                               | 38.50 | 37.72 | 39.72 | 40.50 | 39.83 | 40.33 | 40.67 | 40.83 | 40.22 | 38.00 |       |
|                |                | 1603138   |                | F       | 3.9 | 39.56       | 38.22                                               | 38.94 | 39.61 | 39.78 | 39.44 | 39.50 | 39.72 | 40.22 | 39.67 | 39.56 | 38.50 |       |
|                |                | 1603030   |                | F       | 3.9 | 39.67       | 38.39                                               | 38.89 | 37.72 | 38.89 | 38.28 | 38.83 | 39.33 | 39.11 | 38.56 | 39.33 | 38.94 |       |

d, day; ND, no data

**Supplementary Table 3.** Heart rates of NHPs subjected to 4 or 5.8 Gy TBI or PBI and treated with GT3 or vehicle

| Radiation Dose | Exposure Level | Treatment | Euthanasia (d) | NHP#    | Sex | Age (years) | Heart Rate (BPM) recorded post-irradiation (d) |     |     |     |     |     |     |     |
|----------------|----------------|-----------|----------------|---------|-----|-------------|------------------------------------------------|-----|-----|-----|-----|-----|-----|-----|
|                |                |           |                |         |     |             | -8                                             | 16  | 18  | 20  | 22  | 24  | 26  | 28  |
| 4 Gy           | PBI            | Vehicle   | 30             | 1603102 | F   | 3.9         | 262                                            | 257 | 204 | 144 | 144 | 132 | 148 | 136 |
|                |                |           |                | 1707119 | M   | 3.8         | 256                                            | 220 | 260 | 232 | 224 | 236 | 250 | 212 |
|                |                |           |                | 1704305 | M   | 2.8         | 232                                            | 200 | 230 | 250 | 188 | 196 | 240 | 204 |
|                |                |           |                | 1603026 | F   | 3.9         | 244                                            | 208 | 250 | 260 | 200 | 188 | 215 | 208 |
|                |                |           |                | 1603079 | M   | 3.9         | 180                                            | 230 | 243 | 188 | 136 | 104 | 124 | 144 |
|                |                |           |                | 1704119 | M   | 3.8         | 228                                            | 196 | 250 | 240 | 200 | 188 | 280 | 224 |
|                |                |           |                | 1606088 | F   | 3.6         | 248                                            | 192 | 220 | 208 | 240 | 212 | 230 | 200 |
|                | 1603168        | F         | 3.9            | 244     | 208 | 200         | 220                                            | 208 | 200 | 260 | 192 |     |     |     |
|                | TBI            | Vehicle   | 30             | RA2695  | M   | 4.7         | ND                                             | ND  | ND  | ND  | ND  | ND  | ND  | ND  |
|                |                |           |                | 1606069 | M   | 3.6         | ND                                             | 111 | 193 | 119 | 188 | 136 | 194 | 154 |
|                |                |           |                | RA3228  | F   | 4.1         | ND                                             | ND  | ND  | ND  | ND  | ND  | ND  | ND  |
|                |                |           |                | 1608010 | F   | 3.5         | ND                                             | 248 | 193 | 203 | 245 | 237 | 244 | 235 |
|                |                |           |                | RA3275  | M   | 3.9         | ND                                             | ND  | ND  | ND  | ND  | ND  | ND  | ND  |
|                |                |           |                | 1606093 | M   | 3.6         | ND                                             | 271 | 227 | 175 | 208 | 218 | 202 | 203 |
| RA2770         |                |           |                | F       | 5.1 | ND          | ND                                             | ND  | ND  | ND  | ND  | ND  | ND  |     |
| 1607012        | F              | 3.5       | ND             | 237     | 244 | 234         | 250                                            | 251 | 245 | 218 |     |     |     |     |
| 5.8 Gy         | PBI            | Vehicle   | 30             | 1608017 | M   | 3.5         | 240                                            | 200 | 224 | 224 | 200 | 236 | 200 | 196 |
|                |                |           |                | 1608018 | F   | 3.5         | 232                                            | 196 | 260 | 204 | 196 | 188 | 208 | 220 |
|                |                |           |                | 1604188 | F   | 3.8         | 263                                            | 212 | 230 | 232 | 196 | 228 | 208 | 212 |
|                |                |           |                | 1608007 | M   | 3.5         | 228                                            | 252 | 232 | 224 | 204 | 204 | 212 | 228 |
|                |                |           |                | 1708011 | M   | 2.5         | 208                                            | 224 | 230 | 200 | 220 | 208 | 196 | 216 |
|                |                |           |                | 1603104 | F   | 3.9         | 237                                            | 220 | 250 | 196 | 212 | 224 | 220 | 200 |
|                |                |           |                | 1608006 | F   | 3.5         | 224                                            | 204 | 228 | 192 | 200 | 188 | 240 | 196 |
|                | TBI            | Vehicle   | 30             | 1608039 | M   | 3.5         | ND                                             | 204 | 200 | 214 | 130 | 204 | 234 | 284 |
|                |                |           |                | 1603015 | M   | 3.9         | ND                                             | 206 | 188 | 192 | 194 | 189 | 153 | 141 |
|                |                |           |                | 1607030 | F   | 3.5         | ND                                             | 276 | 240 | 238 | ND  | ND  | ND  | ND  |
|                |                |           |                | 1608016 | F   | 3.5         | ND                                             | 251 | 300 | 253 | ND  | ND  | ND  | ND  |
|                |                |           |                | 1703269 | M   | 2.9         | ND                                             | 249 | 206 | 154 | 181 | 170 | 188 | 186 |
|                |                |           |                | 1607029 | M   | 3.5         | ND                                             | 216 | 244 | 109 | 241 | 218 | 229 | 184 |
|                |                |           |                | 1603138 | F   | 3.9         | ND                                             | 207 | 213 | 204 | 161 | 219 | 192 | 176 |
| 1603030        | F              | 3.9       | ND             | 211     | 273 | 218         | 233                                            | 250 | 228 | 177 |     |     |     |     |

d, day; ND, no data

**Supplementary Table 4.** Blood pressures of NHPs subjected to 4 or 5.8 Gy TBI or PBI and treated with GT3 or vehicle

| Radiation Dose | Exposure Level | Treatment | Euthanasia (d) | NHP#    | Sex     | Age (years) | Blood pressure recorded post-irradiation (d) |         |         |         |         |         |         |         |
|----------------|----------------|-----------|----------------|---------|---------|-------------|----------------------------------------------|---------|---------|---------|---------|---------|---------|---------|
|                |                |           |                |         |         |             | -8                                           | 16      | 18      | 20      | 22      | 24      | 26      | 28      |
| 4 Gy           | PBI            | Vehicle   | 30             | 1603102 | F       | 3.9         | 112/79                                       | 108/76  | 117/46  | 123/82  | 143/104 | 168/115 | 176/113 | 111/75  |
|                |                |           |                | 1707119 | M       | 3.8         | 130/58                                       | 140/99  | 153/97  | 143/93  | 119/99  | 124/95  | 11788   | 121/90  |
|                |                |           |                | 1704305 | M       | 2.8         | 165/88                                       | 127/92  | 157/91  | 134/100 | 145/73  | 157/119 | 136/70  | 132/88  |
|                |                |           |                | 1603026 | F       | 3.9         | 164/122                                      | 154/100 | 169/92  | 168/87  | 171/116 | 162/102 | 179/83  | 137/104 |
|                |                |           |                | 1603079 | M       | 3.9         | 136/94                                       | 99/42   | 106/76  | 120/72  | 89/52   | 125/91  | 146/82  | 138/91  |
|                |                |           |                | 1704119 | M       | 3.8         | 116/68                                       | 134/66  | 120/71  | 120/93  | 129/76  | 127/91  | 127/73  | 131/64  |
|                |                |           |                | 1606088 | F       | 3.6         | 163/119                                      | 145/78  | 144/65  | 133/85  | 125/85  | 155/55  | 142/84  | 133/82  |
|                | 1603168        | F         | 3.9            | 178/96  | 155/125 | 170/96      | 159/90                                       | 172/121 | 152/84  | 183/81  | 126/91  |         |         |         |
|                | TBI            | Vehicle   | 30             | RA2695  | M       | 4.7         | ND                                           | ND      | ND      | ND      | ND      | ND      | ND      | ND      |
|                |                |           |                | 1606069 | M       | 3.6         | ND                                           | 139/98  | 87/61   | 155/114 | 86/40   | 154/114 | 100/62  | 121/68  |
|                |                |           |                | RA3228  | F       | 4.1         | ND                                           | ND      | ND      | ND      | ND      | ND      | ND      | ND      |
|                |                |           |                | 1608010 | F       | 3.5         | ND                                           | 129/82  | 110/79  | 67/45   | 146/105 | 169/105 | 143/47  | 140/50  |
|                |                |           |                | RA3275  | M       | 3.9         | ND                                           | ND      | ND      | ND      | ND      | ND      | ND      | ND      |
|                |                |           |                | 1606093 | M       | 3.6         | ND                                           | 139/99  | 131/80  | 133/91  | 146/73  | 125/70  | 137/95  | 116/88  |
| RA2770         |                |           |                | F       | 5.1     | ND          | ND                                           | ND      | ND      | ND      | ND      | ND      | ND      |         |
| 1607012        | F              | 3.5       | ND             | 89/60   | 105/87  | 117/84      | 101/71                                       | 165/85  | 121/75  | 126/87  |         |         |         |         |
| 5.8 Gy         | PBI            | Vehicle   | 30             | 1608017 | M       | 3.5         | 138/88                                       | 132/64  | 137/63  | 108/65  | 116/82  | 135/74  | 126/74  | 136/67  |
|                |                |           |                | 1608018 | F       | 3.5         | 138/78                                       | 149/91  | 175/122 | 149/68  | 127/99  | 112/77  | 120/71  | 126/68  |
|                |                |           |                | 1604188 | F       | 3.8         | 124/92                                       | 140/86  | 140/89  | 146/103 | 137/84  | 131/82  | 112/78  | 116/66  |
|                |                |           |                | 1608007 | M       | 3.5         | 126/66                                       | 131/69  | 123/87  | 140/105 | 137/87  | 100/72  | 144/94  | 169/90  |
|                |                |           |                | 1708011 | M       | 2.5         | 112/59                                       | 123/101 | 136/59  | 110/59  | 126/94  | 138/96  | 139/64  | 131/47  |
|                |                |           |                | 1603104 | F       | 3.9         | 151/74                                       | 129/69  | 151/84  | 146/110 | 116/85  | 143/86  | 105/61  | 103/67  |
|                |                |           |                | 1608006 | F       | 3.5         | 148/77                                       | 132/71  | 135/99  | 114/93  | 142/79  | 166/134 | 127/53  | 135/78  |
|                | TBI            | Vehicle   | 30             | 1608039 | M       | 3.5         | ND                                           | 121/83  | 139/71  | 86/59   | 138/120 | 132/73  | 109/77  | 107/68  |
|                |                |           |                | 1603015 | M       | 3.9         | ND                                           | 106/73  | 77/59   | 97/58   | 94/62   | 116/48  | 117/87  | 105/61  |
|                |                |           |                | 1607030 | F       | 3.5         | ND                                           | 126/103 | 69/38   | 75/46   | ND      | ND      | ND      | ND      |
|                |                |           |                | 1608016 | F       | 3.5         | ND                                           | 75/54   | 108/43  | 79/31   | ND      | ND      | ND      | ND      |
|                |                |           |                | 1703269 | M       | 2.9         | ND                                           | 142/66  | 71/40   | 132/75  | 130/86  | 100/63  | 114/47  | 111/62  |
|                |                |           |                | 1607029 | M       | 3.5         | ND                                           | 102/85  | 90/60   | 137/99  | 120/96  | 106/67  | 71/55   | 154/123 |
|                |                |           |                | 1603138 | F       | 3.9         | ND                                           | 101/82  | 145/115 | 137/66  | 134/106 | 132/71  | 146/77  | 137/80  |
| 1603030        | F              | 3.9       | ND             | 112/56  | 72/48   | 127/98      | 123/95                                       | 142/106 | 86/68   | 98/56   |         |         |         |         |

d, day; ND, no data
